# Supplementary material for: Monocyte NLRP3 inflammasome and interleukin-1β activation modulated by alpha-1 antitrypsin therapy in deficient individuals
Source: PubMed Central journal article supplement — Thorax. 2024 Feb 28;79(9):822–33. doi: 10.1136/thorax-2023-221071 (PMC11347198; doi:10.1136/thorax-2023-221071), 2024-02-28
Supplement: thorax-2023-221071supp002.pdf [file thorax-2023-221071supp002.pdf]

## Supplementary methodology

### Monocyte NLRP3 inflammasome and interleukin-1 $\beta$ activation modulated by alpha-1 antitrypsin therapy in deficient individuals.

Debananda Gogoi, Howard Yu, Michelle Casey, Rory Baird, Azeez Yusuf, Luke Forde, Michael E. O'Brien, Jesse R. West, Tammy Flagg, Noel G. McElvaney, Edward Eden, Christian Muller, Mark L. Brantly, Patrick Geraghty, and Emer P. Reeves.

#### Chemicals and reagents:

All chemicals and reagents were of the highest purity available and were purchased from Sigma-Aldrich, Dublin, Ireland unless specified otherwise.

#### Patient Genotyping and Phenotyping

AATD patient genotyping was performed on a LightCycler 480 (Roche) with primers for the Z mutation [1] and phenotyping was performed using a Sebia isoelectrofocusing kit with the HYDRASYS system [2].

#### Murine studies

*Serpina1a-e* knockout mice [3], on a C57BL/6J background, were maintained in a specific pathogen-free facility at SUNY Downstate Health Sciences University. Both male and female mice, 8-week-old, were used for the experiments. Blood was collected from the animals and monocytes were isolated using the EasySep™ Mouse Monocyte Isolation Kit (Stemcell™ Technologies) according to manufacturer's instructions. All animal experiments were performed with approval from SUNY Downstate Health Sciences University's Institutional Animal Care and Use Committee. This study was performed in strict accordance with the

recommendations in the Guide for the Care and Use of Laboratory Animals of the National Institutes of Health and Institutional Animal Care and Use Committee (IACUC) guidelines.

### **Plasma isolation and analysis**

Blood was collected in EDTA tubes and placed immediately on ice. Blood tubes were centrifuged at 875 xg for 10 min (4°C) and the upper layer (plasma) was collected. C3d levels were detected in plasma using a Human complement C3 ELISA kit (Cusabio) according to manufacturer's protocol. IL-1 $\beta$  and TNF- $\alpha$  was detected in plasma and cell free supernatants using Human IL-1 $\beta$  DuoSet ELISA kit (R&D Systems) or Human TNF- $\alpha$  DuoSet ELISA kit (R&D Systems) according to manufacturer's protocol.

### **Monocytes isolation and culture**

HC and AATD monocytes were cell sorted using the EasySep™ Human CD14 Positive Selection Kit II (Stemcell™ Technologies) according to manufacturer's instructions. Briefly, up to 25 ml blood was mixed with 0.9% (w/v) saline and layered over Lymphoprep™ for gradient density isolation of peripheral blood mononuclear cells. Monocytes were then isolated, washed and sorted using the Human CD14 Positive Selection Kit II with EasySep magnets (Stemcell™ Technologies). For AAT augmentation therapy studies, we have previously reported that weekly intravenous augmentation therapy 2 days post treatment of ZZ-AATD patients results in serum AAT concentrations similar to healthy control serum levels but also significantly greater than day 0 pre-treatment and 7 days post-treatment [4]. As neutrophil [4-8] and monocyte function [9] is modulated by peak serum levels of AAT on day 2, we chose to obtain blood donations for monocyte isolation from consenting AATD patients, 2 days post augmentation therapy. Resulting monocytes were cultured in RPMI 1640 (Corning) supplemented with 10% (w/v) Fetal Bovine Serum and 0.2% (v/v) Primocin (Invivogen) [10].

Cells were then challenged with C3d with or without receptor inhibitors or inhibitors of cell signalling pathways for indicated times (supplementary table 1). At the end of each treatment protocol, cell supernatants were collected and stored at -80°C for subsequent cytokine analysis, and whole cells processed for indicated assays.

**Supplementary Table 1:** List of inhibitors used in this study

| Inhibitor       | Target receptor/protein | Product Supplier    | Reference  |
|-----------------|-------------------------|---------------------|------------|
| Clone mAb 107   | CR3                     | Merck Life Sciences | # MABF2085 |
| BAY 11-7082     | NF- $\kappa$ B          | Enzo Life Sciences  | #15124578  |
| LY 294002       | PI3 kinase              | Abcam               | #Ab120243  |
| Isobavachalcone | Akt                     | Abcam               | #Ab141168  |
| MCC950          | NLRP3                   | Fischer Scientific  | #15967265  |

### qPCR analysis

Total RNA was extracted from HC or AATD monocytes using the PureLink™ RNA Mini Kit (Invitrogen™) according to manufacturer's instructions. RNA concentrations and purity were assessed with a NanoDrop™ 8000 Spectrophotometer (Thermo Scientific™). RT-qPCR was performed using the Luna® Universal One-Step RT-qPCR Kit (New England Biolabs) with specific primers targeting NLRP3, IL-1 $\beta$ , GRP78, ATF6 and CHOP (supplementary Table 2). Analysis was performed on a LightCycler480 Detection System (Roche) and gene expression was calculated with the 2- $\Delta\Delta$ Ct method using GAPDH as the housekeeping gene [10].

**Supplementary Table 2:** Primers used for qPCR analysis.

| Primer                | Sequence                               | Tm used (°C) |
|-----------------------|----------------------------------------|--------------|
| IL-1 $\beta$ Forward  | 5'-TCGCCAGTGAAATGATGGCT-3'             | 60           |
| IL-1 $\beta$ Reverse  | 5'-TGGAAGGAGCACTTCATCTGTT-3'           | 60           |
| IL-1 $\beta$ Forward  | 5'-ATCGCTTCCTCTCGCAACAA-3'             | 60           |
| IL-1 $\beta$ Reverse  | 5'-TCCAGGTTTTTCATCATCTTCAGC-3'         | 59           |
| NLRP3 Forward         | 5'- GCC GAA GTG GGG TTC AGA TAA -3'    | 60           |
| NLRP3 Reverse         | 5'- GCA GTC GTG TGT AGC GTT TG -3'     | 60           |
| GRP78 Forward         | TaqMan assay ID: Hs00607129_gH         | 58           |
| GRP78 Reverse         | TaqMan assay ID: Hs00607129_gH         | 58           |
| ATF6 Forward          | TaqMan assay ID: Hs00232586_m1         | 58           |
| ATF6 Reverse          | TaqMan assay ID: Hs00232586_m1         | 58           |
| CHOP Forward          | TaqMan assay ID: Hs00358796_g1         | 60           |
| CHOP Reverse          | TaqMan assay ID: Hs00358796_g1         | 60           |
| NF $\kappa$ B Forward | 5'-CCGCTTAGGAGGGAGAGCC-3'              | 60           |
| NF $\kappa$ B Reverse | 5'-TGCCATTCTGAAGCCGGG-3'               | 60           |
| GAPDH Forward         | 5'- CAT GAG AAG TAT GAC AAC AGC CT -3' | 60           |
| GAPDH Reverse         | 5'- AGT CCT TCC ACG ATA CCA AAG T -3'  | 60           |

### Western blot analysis

HC and AATD monocytes were lysed in RIPA buffer (50 mM Tris HCl, 150 mM NaCl, 1.0% (v/v) NP-40, 0.5% (w/v) Sodium Deoxycholate, 1.0 mM EDTA, 0.1% (w/v) SDS and 0.01% (w/v) sodium azide at a pH of 7.4) containing 1% (v/v) Triton X-100 and proteases inhibitor cocktail (ThermoFisher Scientific (#A32959)) for 1h at 4°C. Protein amounts were measured using a BCA Protein Assay Kit (Pierce®), and absorbance was recorded at 540 nm using a SpectraMax M3 microplate Reader (Molecular Devices). Protein samples (10  $\mu$ g) were loaded on 10% (w/v) acrylamide gels and transferred to PVDF membranes by Western blotting (Roche). Primary antibodies (supplementary table 3) were incubated overnight at 4°C. Corresponding secondary antibodies (supplementary table 3) were then incubated for 1h at room temperature. Proteins were detected with Immobilon Western Chemiluminescent Substrate (Merck Millipore) using a ChemiDoc™ Imaging System (Bio-Rad). Densitometry quantification by ImageJ software (NIH) [10].

**Supplementary Table 3:** Antibodies used for Western blot analysis.

| Primary antibodies                             | Species | Supplier                   | Catalogue #    |
|------------------------------------------------|---------|----------------------------|----------------|
| <b>NLRP3</b>                                   | Rabbit  | Cell Signalling Technology | #13158         |
| <b>IL-1<math>\beta</math></b>                  | Rabbit  | Cell Signalling Technology | #12703         |
| <b>Phospho PI3 kinase p85</b>                  | Rabbit  | Cell Signalling Technology | #4228          |
| <b>PI3K p85</b>                                | Rabbit  | Cell Signalling Technology | #4292          |
| <b>pAkt</b>                                    | Rabbit  | Cell Signalling Technology | #4060          |
| <b>Akt</b>                                     | Rabbit  | Cell Signalling Technology | #9272          |
| <b>IK<math>\beta</math><math>\alpha</math></b> | Rabbit  | Cell Signalling Technology | #2859          |
| <b>GRP78</b>                                   | Mouse   | Enzo Life Sciences         | #ADI-SPA-826-D |
| <b>GRP78</b>                                   | Rabbit  | Cell Signalling Technology | #5554          |
| <b>ATF6</b>                                    | Mouse   | Novus Biologicals          | # NBP1-40256SS |
| <b>ATF6</b>                                    | Rabbit  | Abcam                      | #ab11909       |
| <b>ASC/TMS1</b>                                | Rabbit  | Cell Signalling Technology | #13833         |
| <b><math>\beta</math>-Actin</b>                | Mouse   | Santa Cruz Technology      | #sc-47778      |
| <b><math>\beta</math>-Actin</b>                | Rabbit  | Cell Signalling Technology | #8457          |
| Secondary antibodies                           | Species | Supplier                   | Catalogue #    |
| <b>Rabbit-HRP conjugate</b>                    | Rabbit  | Cell Signaling Technology  | #7074          |
| <b>Mouse-HRP conjugate</b>                     | Horse   | Cell Signaling Technology  | #7076          |

**Flow cytometry analysis**

In CR3 receptor blocking experiments, isolated monocytes were incubated with or without the CR3 inhibitor, clone mAb 107 (monoclonal antibody, #MABF2085) (1 $\mu$ g/ml) for 1h. Subsequently, C3d (5 $\mu$ g) (Complement Technologies) binding was evaluated using C3d mouse monoclonal IgG1 antibody (1 $\mu$ g/ml) (Abcam) followed by FITC labelled mouse IgG kappa binding protein (m-IgG $\kappa$  BP) (1 $\mu$ g/ml) (Santa Cruz Biotechnology). In a subset of experiments, C3d binding to AAT was measured with rabbit anti-C3d fluorescein isothiocyanate (FITC)-labelled antibody (Abcam) or a non-specific IgG1 FITC control (IsoAb) (Thermo Fisher Scientific) using a FACScalibur flow cytometer (Becton Dickinson). Binding of C3d to CR3 receptor in the presence of glycosylated human-AAT (h-AAT; Athens Research) or deglycosylated AAT was quantified using rabbit anti-C3d FITC-labelled antibody. Controls for the experiments employed cells alone, or cells incubated with respective mouse/rabbit

monoclonal IgG1 antibody and/or FITC labelled m-IgGκ BP. Cells were then washed and fluorescence recorded. Ten thousand events per reaction were quantified. Analysis of fluorescence was carried out using FlowJo\_v10.8.1 software and data represented as median fluorescent intensity (MFI).

### **Caspase-1 activity assays**

Caspase-1 activity was assessed in HC or AATD monocytes using the Caspase-Glo® 1 Inflammasome Assay (Promega) according to manufacturer's instructions. Briefly, Caspase-Glo® 1 Reagent was added to monocytes to a ratio of 1:1. After 1h, luminescence was recorded using a SpectraMax M3 microplate reader (Molecular Devices).

### **Intracellular Ca<sup>2+</sup> assay**

Intracellular Ca<sup>2+</sup> was detected by fluorescence using the Fluo-8 No Wash assay kit (Abcam) following manufacturer's instructions and fluorescence was recorded using a SpectraMax M3 microplate reader (Molecular Devices) [10].

### **Z-AAT polymer quantification**

A sandwich ELISA with plasma samples and monocyte lysates was performed using the 2C1 monoclonal antibody (mAb) against AAT polymers [11]. Plates were coated overnight at room temperature with 50 µL/well of purified 2C1 mAb at 2 µg/mL as per supplier instructions (SRM Monoclonal Antibody (2C1), Invitrogen, #15588852). The following day, plates were washed and incubated with 300 µL/well of blocking solution for 1 h. Standards and samples were diluted in blocking buffer, added to the plate and incubated for 2 h at room temperature. Bound polymers were detected with anti-total AAT 3C11 mAb labelled with horseradish peroxidase incubated for 1h (ZNF197 Monoclonal Antibody (3C11), Invitrogen, #15578932),

and quantified in a plate reader at 450 nm using a 3,3',5,5'-tetramethylbenzidine (TMB) substrate solution. Concentrations of AAT polymers ( $\mu\text{g/mL}$ ) were determined by interpolation of absorbance values on a standard curve. An AAT polymer standard was prepared by heating purified AAT (0.5 mg/mL) at 55 °C for 16 h. The proportion of polymers versus the total levels of AAT (%) was determined in all samples together with total polymer concentrations ( $\mu\text{g/mL}$ ). Measurements were carried out in triplicates and the lower limit of detection of the ELISA was 10  $\mu\text{g/mL}$ .

### **Statistical analysis**

Data were analysed using GraphPad Prism 8.0 for PC. Appropriate descriptive statistics (e.g., mean, standard deviation (SD), median, frequencies, and counts) were used to describe patient characteristics and outcomes of interest. Statistical significance was calculated using a Student's t-test when comparisons were made between two groups when normally distributed. Non-normal data were analysed by the two tailed non parametric Mann-Whitney U test. Linear and multiple regression modelling was employed to examine the significance of any relationship within the clinical data or between the clinical data. Adjustment was performed for covariates that included age and was reported using the standardized ANCOVA analysis. Two tailed non parametric spearman correlation test was used to determine the positive and/or negative correlation between two continuous variables. One-way ANOVA was used to determine statistical significance when comparing three or more groups followed by Tukeys' post-hoc multiple comparison test. A value of  $p < 0.05$  was considered statistically significant.

**Supplementary Reference list**

1. Rodriguez F, Jardi R, Costa X, et al. Rapid screening for alpha1-antitrypsin deficiency in patients with chronic obstructive pulmonary disease using dried blood specimens. *Am J Respir Crit Care Med* 2002;166(6):814-7.
2. Zerimech F, Hennache G, Bellon F, et al. Evaluation of a new Sebia isoelectrofocusing kit for  $\alpha_1$ -antitrypsin phenotyping with the Hydrasys System. *Clin Chem Lab Med* 2008;46(2):260-63.
3. Borel F, Sun H, Zieger M, et al. Editing out five Serpina1 paralogs to create a mouse model of genetic emphysema. *Proc Natl Acad Sci U S A* 2018;115(11):2788-93. doi: 10.1073/pnas.1713689115
4. Bergin DA, Reeves EP, Meleady P, et al. Alpha-1 Antitrypsin regulates human neutrophil chemotaxis induced by soluble immune complexes and IL-8. *J Clin Invest* 2010;120(12):4236-50.
5. O'Dwyer CA, O'Brien ME, Wormald MR, et al. The BLT1 Inhibitory Function of alpha-1 Antitrypsin Augmentation Therapy Disrupts Leukotriene B4 Neutrophil Signaling. *J Immunol* 2015;195(8):3628-41.
6. Murphy MP, McEnery T, McQuillan K, et al. alpha1 Antitrypsin therapy modulates the neutrophil membrane proteome and secretome. *Eur Respir J* 2020;55(4)
7. McEnery T, White MM, Gogoi D, et al. Alpha-1 Antitrypsin Therapy Modifies Neutrophil Adhesion in Patients with Obstructive Lung Disease. *Am J Respir Cell Mol Biol* 2022;67(1):76-88.
8. Bergin DA, Reeves EP, Hurley K, et al. The Circulating Proteinase Inhibitor alpha-1 Antitrypsin Regulates Neutrophil Degranulation and Autoimmunity. *Sci Transl Med* 2014;6(217):217ra1.



9. Hassan T, de Santi C, Mooney C, et al. Alpha-1 antitrypsin augmentation therapy decreases miR-199a-5p, miR-598 and miR-320a expression in monocytes via inhibition of NFkappaB. *Sci Rep* 2017;7(1):13803.
10. Gabillard-Lefort C, Casey M, Glasgow AMA, et al. Trikafta Rescues CFTR and Lowers Monocyte P2X7R-induced Inflammasome Activation in Cystic Fibrosis. *Am J Respir Crit Care Med* 2022;205(7):783-94.
11. Miranda E, Perez J, Ekeowa UI, et al. A novel monoclonal antibody to characterize pathogenic polymers in liver disease associated with alpha1-antitrypsin deficiency. *Hepatology* 2010;52(3):1078-88.
